# Supplementary material for: A simple hydrogen peroxide-activatable Bodipy for tumor imaging and type I/II photodynamic therapy
Source: Royal Society of Chemistry journal article supplement (doi:10.1039/d4tb01650e), 2024-01-01
Supplement: d4tb01650e1.pdf [file d4tb01650e1.pdf]

## Supporting Information

### **A Simple Hydrogen Peroxide-Activatable Bodipy for Tumor Imaging and Type I/II Photodynamic Therapy**

*Fangqing Ge,<sup>a,≠</sup> Yujie Sun,<sup>b,≠</sup> Yu Wang,<sup>b</sup> Dan Yu,<sup>b</sup> Zhijia Wang,<sup>a,b</sup> \* Fabiao Yu,<sup>c,\*</sup>  
Bingran Yu,<sup>b,\*</sup> Hongbing Fu<sup>a</sup>*

*<sup>a</sup> Beijing Key Laboratory for Optical Materials and Photonic Devices, Department of Chemistry, Capital Normal University, Beijing 100048, P. R. China. Email: wangzhj@cnu.edu.cn*

*<sup>b</sup> Laboratory of Biomedical Materials and Key Lab of Biomedical Materials of Natural Macromolecules (Beijing University of Chemical Technology, Ministry of Education), Beijing University of Chemical Technology, Beijing 100029, P. R. China. Email: yubr@mail.buct.edu.cn*

*<sup>c</sup> Key Laboratory of Emergency and Trauma, Ministry of Education, Key Laboratory of Haikou Trauma · Key Laboratory of Hainan Trauma and Disaster Rescue, Engineering Research Centre for Hainan Bio-Smart Materials and Bio-Medical Devices, Key Laboratory of Hainan Functional Materials and Molecular Imaging, The First Affiliated Hospital of Hainan Medical University, Hainan Medical University, Haikou 571199, China. Email: yufabiao@muhn.edu.cn*

## Contents

|                                                                        |                |
|------------------------------------------------------------------------|----------------|
| <b>1. Synthesis.....</b>                                               | <b>Page S3</b> |
| <b>2. UV–visible Absorption and Fluorescence Emission Spectra.....</b> | <b>Page S4</b> |
| <b>3. EPR Signals.....</b>                                             | <b>Page S6</b> |
| <b>4. Flow Cytometry Analysis.....</b>                                 | <b>Page S7</b> |
| <b>5. H&amp;E Stainings.....</b>                                       | <b>Page S8</b> |
| <b>6. NMR and HRMS Spectra.....</b>                                    | <b>Page S9</b> |

## 1. Synthesis.

**Synthesis of BpinBDP:** 18.8 mg compound **4** and 24 mg Alk-PEG2k were dissolved in  $\text{CHCl}_3$  : EtOH :  $\text{H}_2\text{O}$  (8 mL : 0.6 mL : 0.6 mL), the mixture was deoxygenate via three freeze-thaw cycles. Subsequently, 10 mg CuBr were added and the solution was stirred in 30 °C for 12 h. The solvent was evaporated under reduced pressure and then re-dissolved in water. The unreacted Bodipy dyes and residual catalysts were removed via filtration and Sephadex G50 column. Finally, the solution was dialysis in DI water for 12 h.  $^1\text{H}$  NMR (400 MHz,  $d_6$ -DMSO)  $\delta$  = 8.13 (s, 2H), 7.64-7.44 (m, 13H), 7.05 (t,  $J$  = 8.0 Hz, 2H), 5.57 (d,  $J$  = 12.0 Hz, 2H), 4.07 (d,  $J$  = 4.0 Hz, 2H), 3.50 (s, 174H), 2.11 (s, 6H), 1.98 (t,  $J$  = 8.0 Hz, 4H), 1.23 (s, 12H). TOF MALDI-HRMS: calculated  $m/z \approx 3200$  Da, found  $m/z \approx 3200$  Da.

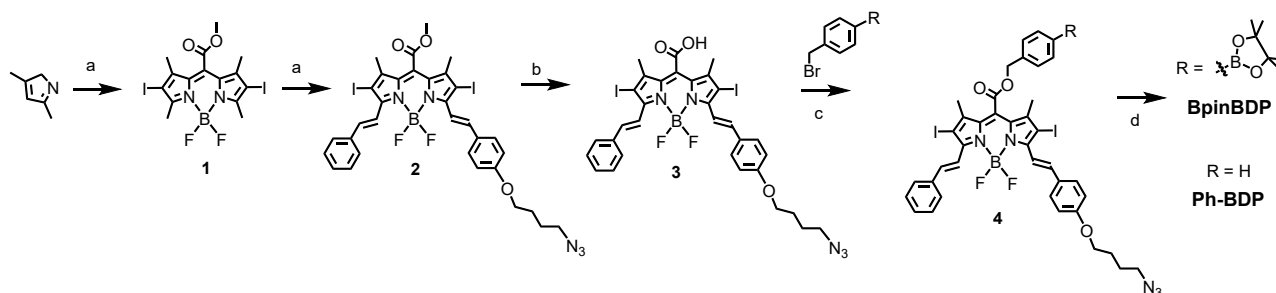

**Scheme S1.** The synthesis route of **BpinBDP**.

## 2. UV–visible Absorption and Fluorescence Emission Spectra.

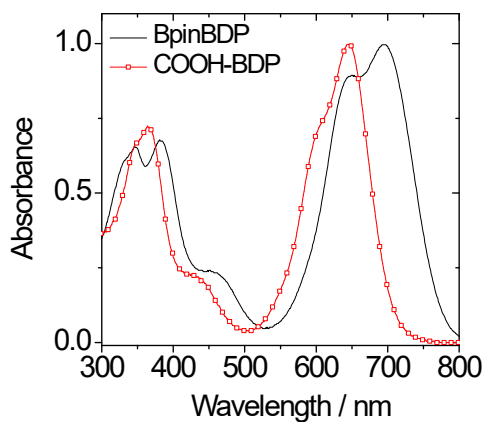

**Figure S1.** Normalized UV–vis absorption of **BpinBDP** and **COOH-BDP-PEG** in PBS (pH = 7.4).

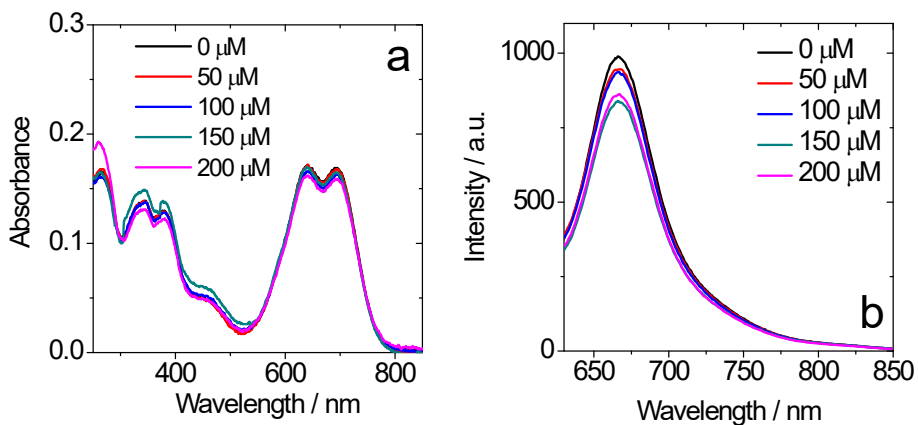

**Figure S2.** (a) UV–visible absorption and (b) fluorescence emission of **PhBDP** upon addition of different concentration of H<sub>2</sub>O<sub>2</sub> in PBS (pH = 7.4) and incubating with 2 h at 37 °C.

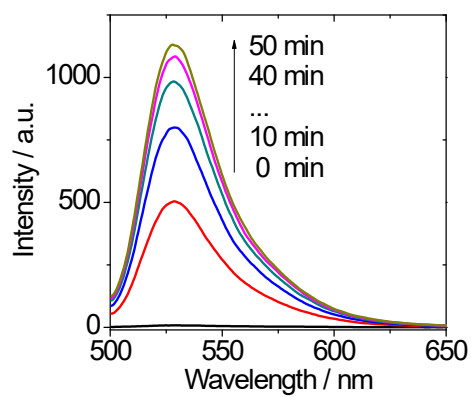

**Figure S3.** Fluorescence emission of dihydrorhodamine 123 (DHR123) at different irradiation time in the presence of **BpinBDP**, indicating the production of superoxide anion.

### 3. EPR Signals.

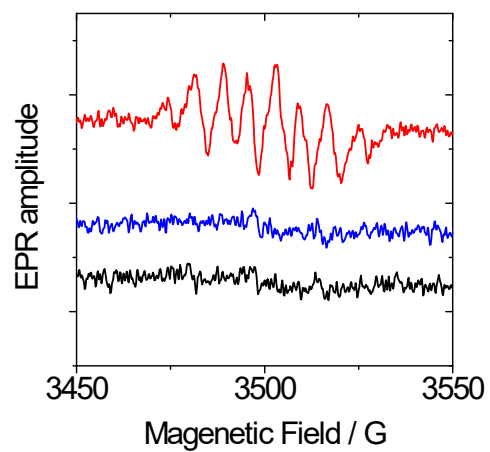

**Figure S4.** EPR signals of dimethyl-1-pyrroline-*N*-oxide (DMPO) for superoxide anion characterization in MeOH.

#### 4. Flow cytometry analysis.

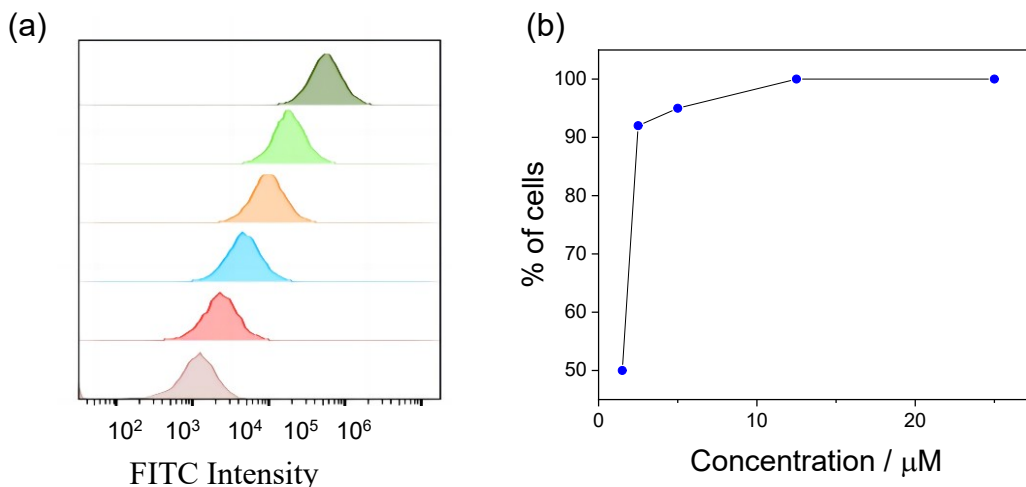

**Figure S5.** (a) Flow cytometry analysis of 4T1 cancer cells treated with different concentration of **BpinBDP** for 2 hours to study the relationship between uptake efficiency and concentration. (a) The number of cells containing **BpinBDP** is assigned by cells of higher FITC intensity than the threshold intensity (of untreated cells). (b) Percentage of cells containing **BpinBDP** in different incubation concentration..

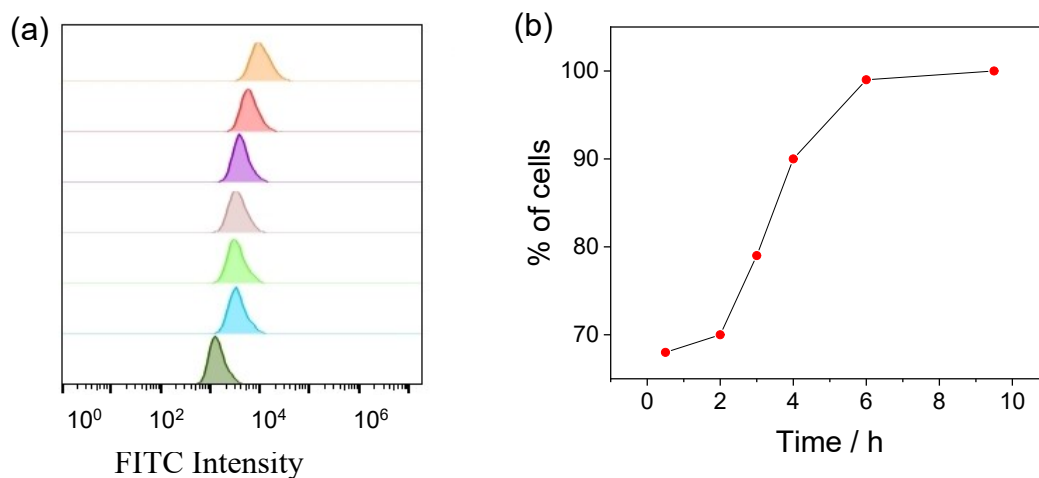

**Figure S6.** Flow cytometry analysis of 4T1 cancer cells after 0 h, 0.5 h, 2.0 h, 3.0 h, 4.0 h, 6.0 h and 9.5 h post incubation of **BpinBDP** ( $c = 10 \mu\text{M}$ ) to study the relationship between uptake efficiency and time points. (a) The number of cells containing **BpinBDP** is assigned by cells of

higher FITC intensity than the threshold intensity (of untreated cells). (b) Percentage of cells containing **BpinBDP** at different incubation time points

### 5. H&E Stainings.

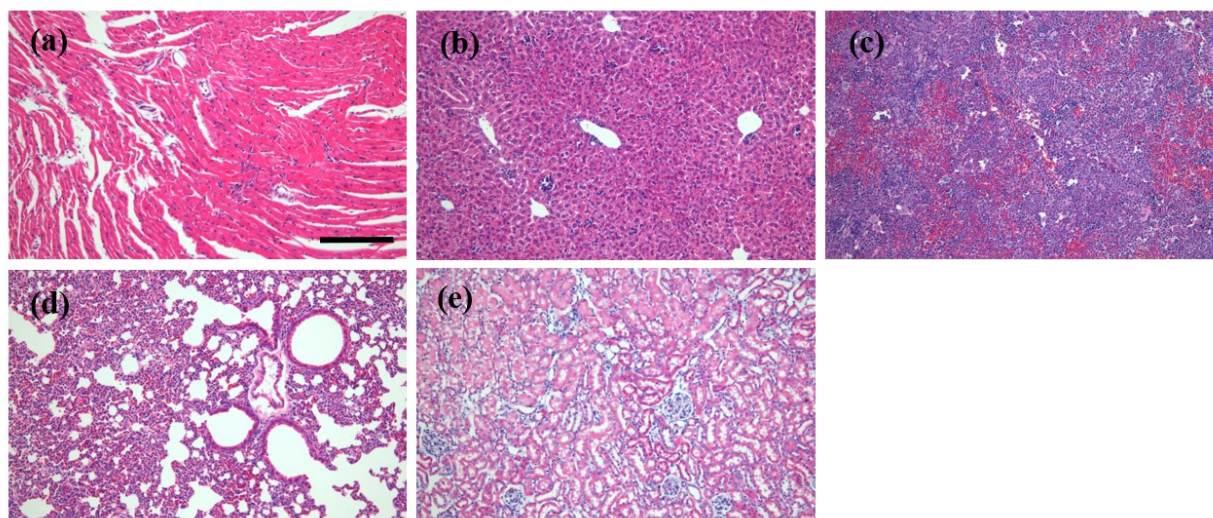

**Figure S7.** H&E stainings of heart, liver, spleen, lung and kidney of Group 1. Scale bar = 200  $\mu\text{m}$ .

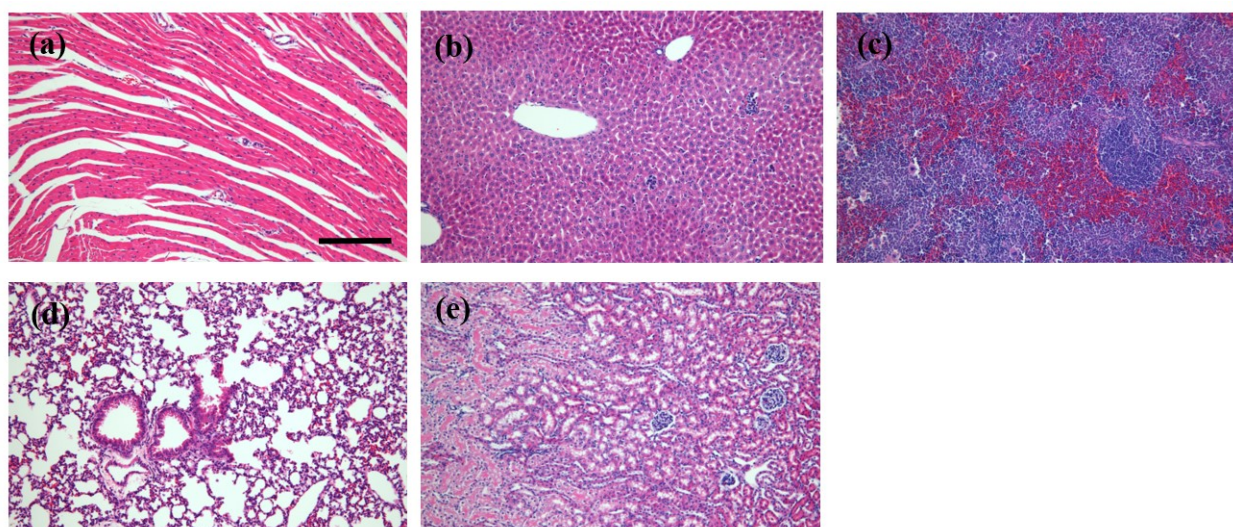

**Figure S8.** H&E stainings of heart, liver, spleen, lung and kidney of Group 2. Scale bar = 200  $\mu\text{m}$ .



## 6. NMR and HRMS Spectra.

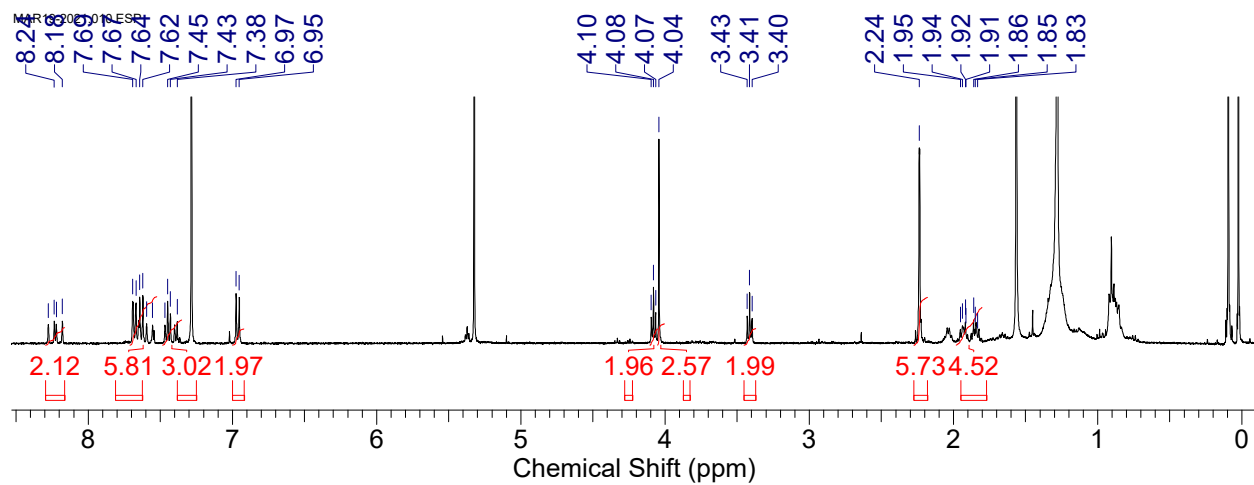

**Figure S9.** <sup>1</sup>H-NMR of compound **2** in CDCl<sub>3</sub>.

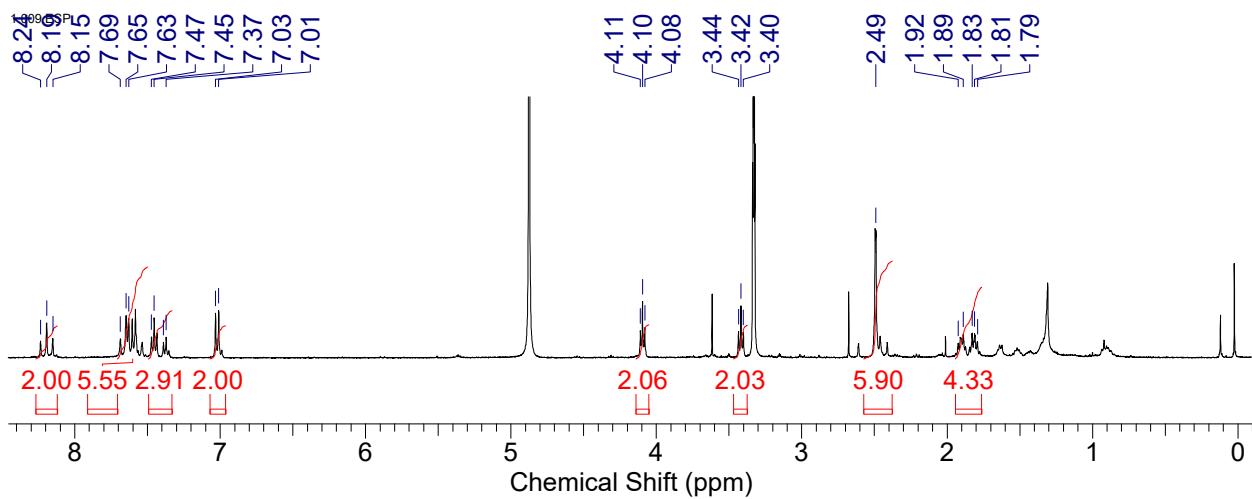

**Figure S10.** <sup>1</sup>H-NMR of compound **3** in MeOD.

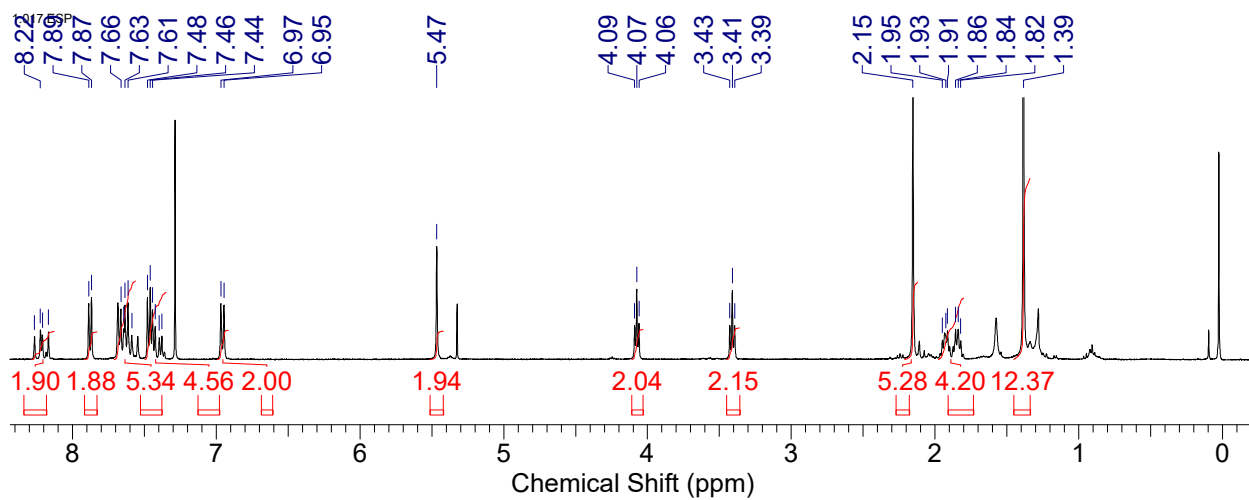

**Figure S11.**  $^1\text{H-NMR}$  of compound **4** in  $\text{CDCl}_3$ .

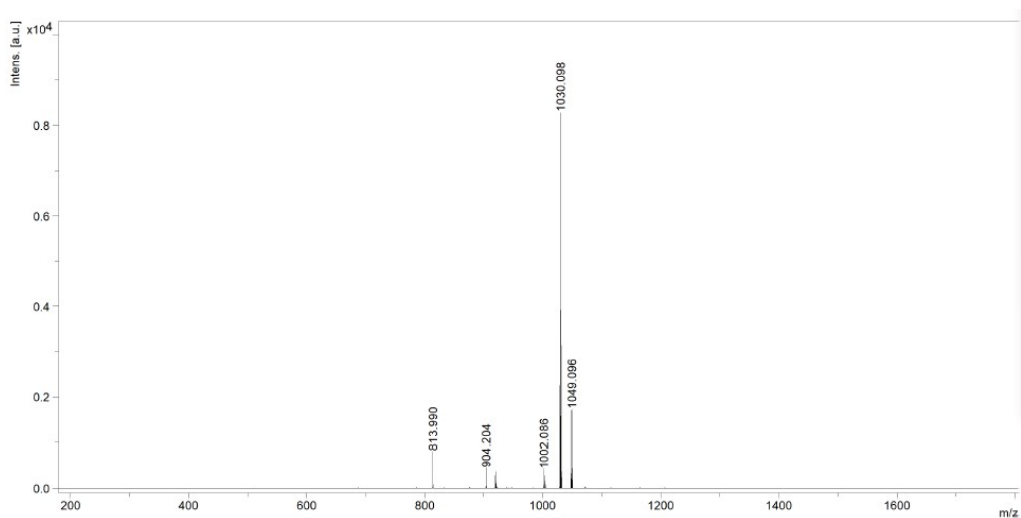

**Figure S12.** MALDI-ToF-MS of compound **4**.

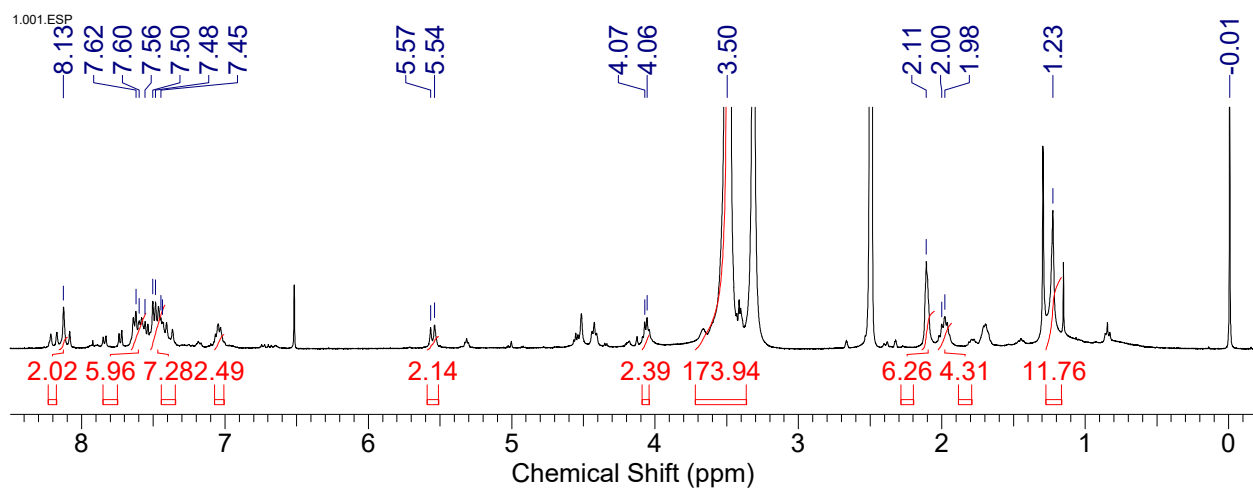

**Figure S13.**  $^1\text{H-NMR}$  of compound **BpinBDP** in  $d_6\text{-DMSO}$ .

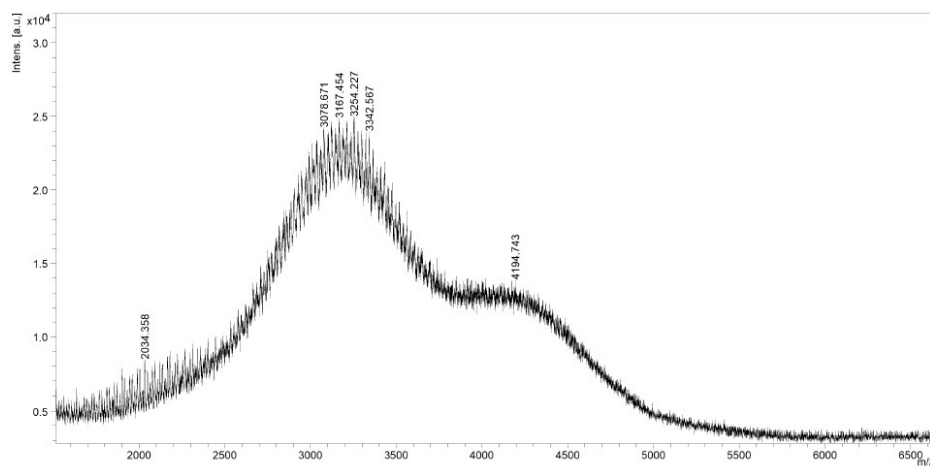

**Figure S14.** MALDI-ToF-MS of **BpinBDP**.

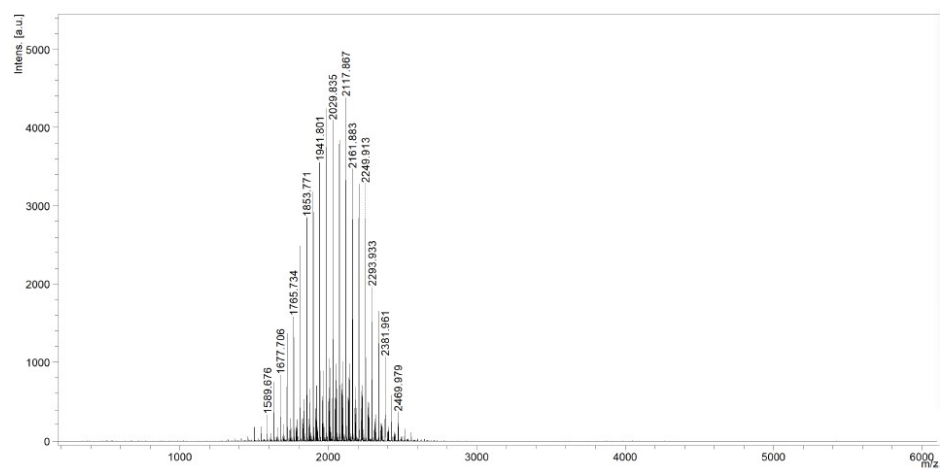

**Figure S15.** MALDI-ToF-MS of Alk-PEG2k.
